# Supplementary material for: In Vitro and Ex Vivo Analysis of CHRNA3 and CHRNA5 Haplotype Expression
Source: PLoS One. 2011 Aug 12;6(8):e23373. doi: 10.1371/journal.pone.0023373 (PMC3155531; doi:10.1371/journal.pone.0023373)
Supplement: Table S1 — PCR and QuikChange® Primers and Parameters. (XLS) [file pone.0023373.s004.xls]

## Sheet: Sheet1
Supplemental Table S1. PCR and QuikChange® Primers and Parameters
Region Amplified by Polymerase Chain Reaction	Forward Primer	Reverse Primer	PCR Parameters
CHRNA5
rs3841324 promoter deletion genotyping	5’-AAAAGGAACAAGGCGAGGATTG-3’	5’-GAGTCGTGAGACAAAACG-3’	Hold: 94°C - 5 min; 30 cycles: 94°C- 30 sec, 60°C- 30 sec, 72°C - 30 sec; Hold: 72°C - 5 min; Hold: 4°C -soak
Core promoter (-1440 to +1 at AUG) - Primary PCR	5’-CGCTCGAGCCTGTTTAAACAGATTGGCTCC-3’	5’-TAGTCTCCAGCGATGCAGGTCG-3’	Hold: 94°C - 5 min; 35 cycles: 94°C- 30 sec, 60°C- 30 sec, 72°C - 2 min; Hold: 72°C - 5 min; Hold: 4°C -soak
Core promoter (-1440 to +1 at AUG) - Secondary PCR	5’-CGCTCGAGCCTGTTTAAACAGATTGGCTCC-3’	5’-CGCCGCCATGGCCCCGC-3’	Hold: 94°C - 5 min; 25 cycles: 94°C- 30 sec, 62°C- 20 sec, 72°C - 1 min 45 sec; Hold: 72°C - 5 min; Hold: 4°C -soak
Distal promoter (~13.5 kb upstream of +1)	5’-CTGCTTTCCATCCAGATCAGTAG-3’	5’-CAGGAACATGGTAAGTGTCC-3’	Hold: 94°C - 2 min; 10 cycles: 94°C - 10 sec, 52°C - 30 sec, 68°C - 1 min; 25 cycles with 20 sec per cycle increase at 52°C extension; Hold: 72°C - 5 min; Hold: 4°C - soak
Allelic imbalance - exon 5 (rs16969968)	5’-CGCCTTTGGTCCGCAAGATA-3’	5’-CACGGACATCATTTTCCTTCATG-3’	Hold: 94°C - 5 min; 30 cycles: 94°C- 30 sec, 56°C- 30 sec, 72°C - 30 sec; Hold: 72°C - 7 min; Hold: 4°C -soak
CHRNA3
Core promoter (-1442 to +1 at AUG) - Primary PCR	5’-CGCTCGAGGCCAATCAGTGCACATTC-3’	5’-TACCTGGCAGCAGAGACAGCAG-3’	Hold: 94°C - 5 min; 35 cycles: 94°C- 30 sec, 60°C- 30 sec, 72°C - 2 min; Hold: 72°C - 5 min; Hold: 4°C -soak
Core promoter (-1442 to +1 at AUG) - Secondary PCR	5’-CGCTCGAGGCCAATCAGTGCACATTC-3’	5’-AGAGCCCATGGCTGGTG-3’	Hold: 94°C - 5 min; 25 cycles: 94°C- 30 sec, 54°C- 30 sec, 72°C - 1 min 45 sec; Hold: 72°C - 5 min; Hold: 4°C -soak
Allelic imbalance - exon 5 (rs1051730)	5’-CCATGAACCTCAAGGACTATTGG-3’	5’-GAGGTTGATGGTGTAGAACAAGG-3’	Hold: 94°C - 5 min; 30 cycles: 94°C- 30 sec, 60°C- 30 sec, 72°C - 30 sec; Hold: 72°C - 7 min; Hold: 4°C -soak
QuikChange® Reactions	Top Primer	Bottom Primer
CHRNA5
rs503464	5’‑GCCAGAAGCTGCTAGGCTGAGGCTGCTGTC-3’	5’-GACAGCAGCCTCAGCCTAGCAGCTTCTGGC-3’	Hold: 95°C - 30 sec; 12 cycles: 95°C- 30 sec, 55°C- 1 min, 68°C - 6 min; Hold: 68°C - 5 min; Hold: 4°C -soak
rs55853698	5’-GAGCGGCCCCGCTGCTGCGTCTGCCCTC-3’	5’‑GAGGGCAGACGCAGCAGCGGGGCCGCTC-3’	Hold: 95°C - 30 sec; 12 cycles: 95°C- 30 sec, 55°C- 1 min, 68°C - 6 min; Hold: 68°C - 5 min; Hold: 4°C -soak
rs55781567	5’‑CTCACACTCAGTGCTGCATTCCCCAAGAGTTCG-3’	5’‑CGAACTCTTGGGGAATGCAGCACTGAGTGTGAG-3’	Hold: 95°C - 30 sec; 12 cycles: 95°C- 30 sec, 55°C- 1 min, 68°C - 6 min; Hold: 68°C - 5 min; Hold: 4°C -soak
